# Supplementary material for: Single crystals of undoped Li2WO4 and Li2W1−0.0125Mo0.0125O4: formation enthalpies, heat capacity in the temperature range 320–997 K
Source: Royal Society of Chemistry journal article supplement (doi:10.1039/d1dt01620b), 2021-01-01
Supplement: d1dt01620b1.pdf [file d1dt01620b1.pdf]

Supporting Information for:

**Single crystals of undoped  $\text{Li}_2\text{WO}_4$  and  $\text{Li}_2\text{W}_{1-0.0125}\text{Mo}_{0.0125}\text{O}_4$ : Formation enthalpies, heat capacity in the temperature range 320-997 K**

*Nata I. Matskevich,<sup>\*a</sup> Vladimir N. Shlegel,<sup>a</sup> Anna N. Semerikova,<sup>a</sup> Dmitrii A. Samoshkin,<sup>a,b</sup> Veronika D. Grigorieva,<sup>a</sup> Sergei V. Stankus,<sup>b</sup> Vitalii A. Kuznetsov,<sup>a</sup> Sofiya A. Ponomareva,<sup>a</sup> Valerii P. Zaitsev<sup>a,c</sup> and Andrei Yu. Novikov<sup>a</sup>*

<sup>a</sup> Nikolaev Institute of Inorganic Chemistry, Siberian Branch of the Russian Academy of Sciences, 3 Lavrentiev Prospect, 630090 Novosibirsk, Russian Federation

<sup>b</sup> Kutateladze Institute of Thermophysics, Siberian Branch of the Russian Academy of Sciences, 1 Lavrentiev Prospect, 630090 Novosibirsk, Russian Federation

<sup>c</sup> Siberian State University of Water Transport, 33 Shchetinkina Avenue, 630099, Russian Federation

**Table S1.** Selected experimental values of the heat capacity of  $\text{Li}_2\text{W}_{0.9875}\text{Mo}_{0.0125}\text{O}_4$  in the temperature range of 319-997 K (molar mass is 260.63073 g mol<sup>-1</sup>) at pressure  $p = 0.1$  MPa ( $u(p) = 0.05p$ ).

| T/K   | $C_{p,m}^0$ /<br>J mol <sup>-1</sup><br>K <sup>-1</sup> |
|-------|---------------------------------------------------------|-------|---------------------------------------------------------|-------|---------------------------------------------------------|-------|---------------------------------------------------------|
| 319.1 | 133.4                                                   | 490.2 | 156.9                                                   | 661.0 | 168.9                                                   | 832.1 | 176.7                                                   |
| 322.1 | 134.2                                                   | 493.0 | 157.2                                                   | 664.2 | 168.9                                                   | 835.2 | 177.0                                                   |
| 325.1 | 135.0                                                   | 496.1 | 157.4                                                   | 667.1 | 168.9                                                   | 838.1 | 177.2                                                   |
| 328.1 | 135.5                                                   | 499.2 | 157.7                                                   | 670.0 | 169.1                                                   | 841.2 | 177.2                                                   |
| 331.1 | 136.0                                                   | 502.0 | 157.9                                                   | 673.2 | 169.1                                                   | 844.0 | 177.2                                                   |
| 334.1 | 136.6                                                   | 505.1 | 158.2                                                   | 676.1 | 169.4                                                   | 847.1 | 177.5                                                   |
| 337.1 | 137.1                                                   | 508.2 | 158.5                                                   | 679.1 | 169.7                                                   | 850.2 | 177.5                                                   |
| 340.1 | 137.6                                                   | 511.1 | 158.7                                                   | 682.0 | 169.7                                                   | 853.1 | 177.7                                                   |
| 343.0 | 138.1                                                   | 514.1 | 159.0                                                   | 685.2 | 169.9                                                   | 856.1 | 178.0                                                   |
| 346.2 | 138.7                                                   | 517.2 | 159.5                                                   | 688.1 | 169.9                                                   | 859.2 | 178.3                                                   |
| 349.0 | 139.2                                                   | 520.1 | 159.5                                                   | 691.0 | 170.2                                                   | 862.0 | 178.3                                                   |
| 352.1 | 139.7                                                   | 523.1 | 159.8                                                   | 694.1 | 170.2                                                   | 865.1 | 178.3                                                   |
| 355.1 | 140.0                                                   | 526.2 | 160.0                                                   | 697.1 | 170.2                                                   | 868.1 | 178.3                                                   |
| 358.1 | 140.5                                                   | 529.0 | 160.3                                                   | 700.2 | 170.2                                                   | 871.2 | 178.5                                                   |
| 361.0 | 141.0                                                   | 532.1 | 160.3                                                   | 703.1 | 170.2                                                   | 874.0 | 178.5                                                   |
| 364.1 | 141.3                                                   | 535.2 | 160.5                                                   | 706.0 | 170.2                                                   | 877.1 | 178.8                                                   |
| 367.1 | 141.8                                                   | 538.0 | 161.1                                                   | 709.1 | 170.4                                                   | 880.2 | 179.0                                                   |
| 370.1 | 142.3                                                   | 541.1 | 161.3                                                   | 712.1 | 170.4                                                   | 883.1 | 179.0                                                   |
| 373.1 | 142.8                                                   | 544.1 | 161.6                                                   | 715.2 | 171.0                                                   | 886.1 | 179.0                                                   |
| 376.1 | 143.3                                                   | 547.2 | 161.8                                                   | 718.1 | 171.2                                                   | 889.0 | 179.3                                                   |
| 379.2 | 143.6                                                   | 550.0 | 161.8                                                   | 721.1 | 171.5                                                   | 892.1 | 179.6                                                   |
| 382.0 | 144.1                                                   | 553.1 | 162.1                                                   | 724.2 | 171.8                                                   | 895.2 | 179.6                                                   |
| 385.1 | 144.6                                                   | 556.1 | 162.1                                                   | 727.1 | 171.8                                                   | 898.0 | 179.3                                                   |
| 388.0 | 144.9                                                   | 559.2 | 162.4                                                   | 730.0 | 171.8                                                   | 901.1 | 179.3                                                   |
| 391.2 | 145.2                                                   | 562.2 | 162.6                                                   | 733.2 | 171.8                                                   | 904.2 | 179.6                                                   |
| 394.1 | 145.7                                                   | 565.0 | 162.9                                                   | 736.1 | 171.8                                                   | 907.0 | 179.8                                                   |
| 397.0 | 145.9                                                   | 568.1 | 163.1                                                   | 739.0 | 172.0                                                   | 910.1 | 179.8                                                   |
| 400.2 | 146.5                                                   | 571.1 | 163.4                                                   | 742.1 | 172.0                                                   | 913.1 | 180.1                                                   |
| 403.2 | 146.7                                                   | 574.1 | 163.4                                                   | 745.0 | 172.0                                                   | 916.0 | 180.6                                                   |
| 406.1 | 147.3                                                   | 577.2 | 163.7                                                   | 748.2 | 172.3                                                   | 919.1 | 180.9                                                   |
| 409.1 | 147.5                                                   | 580.2 | 163.7                                                   | 751.1 | 172.3                                                   | 922.1 | 180.9                                                   |
| 412.1 | 148.0                                                   | 583.2 | 163.9                                                   | 754.2 | 172.5                                                   | 925.2 | 181.1                                                   |
| 415.1 | 148.3                                                   | 586.0 | 164.2                                                   | 757.1 | 172.8                                                   | 928.0 | 181.1                                                   |
| 418.1 | 148.6                                                   | 589.0 | 164.5                                                   | 760.2 | 172.8                                                   | 931.0 | 181.1                                                   |
| 421.2 | 149.1                                                   | 592.0 | 164.7                                                   | 763.1 | 173.1                                                   | 934.0 | 181.1                                                   |
| 424.2 | 149.3                                                   | 595.1 | 165.0                                                   | 766.2 | 173.1                                                   | 937.0 | 181.1                                                   |
| 427.0 | 149.9                                                   | 598.1 | 165.2                                                   | 769.1 | 173.3                                                   | 940.1 | 181.1                                                   |
| 430.1 | 150.4                                                   | 601.1 | 165.5                                                   | 772.2 | 173.6                                                   | 943.3 | 181.4                                                   |
| 433.1 | 150.6                                                   | 604.1 | 165.8                                                   | 775.1 | 173.6                                                   | 946.3 | 181.7                                                   |
| 436.2 | 151.2                                                   | 607.1 | 166.0                                                   | 778.0 | 173.8                                                   | 949.1 | 181.9                                                   |
| 439.0 | 151.4                                                   | 610.1 | 166.0                                                   | 781.0 | 174.1                                                   | 952.2 | 181.7                                                   |
| 442.1 | 151.7                                                   | 613.1 | 166.3                                                   | 784.2 | 174.1                                                   | 955.0 | 181.7                                                   |

---

|       |       |       |       |       |       |       |       |
|-------|-------|-------|-------|-------|-------|-------|-------|
| 445.1 | 152.2 | 616.1 | 166.5 | 787.1 | 174.4 | 958.0 | 181.4 |
| 448.2 | 152.5 | 619.0 | 166.5 | 790.1 | 174.6 | 961.1 | 181.7 |
| 451.0 | 152.7 | 622.0 | 166.8 | 793.2 | 174.9 | 964.1 | 182.2 |
| 454.1 | 153.0 | 625.0 | 166.8 | 796.1 | 174.9 | 967.2 | 182.4 |
| 457.2 | 153.2 | 628.2 | 166.8 | 799.2 | 175.1 | 970.0 | 182.4 |
| 460.0 | 153.5 | 631.2 | 167.3 | 802.0 | 175.1 | 973.1 | 182.4 |
| 463.1 | 154.0 | 634.1 | 167.6 | 805.1 | 175.4 | 976.1 | 182.7 |
| 466.2 | 154.3 | 637.1 | 167.6 | 808.2 | 175.7 | 979.2 | 183.2 |
| 469.0 | 154.5 | 640.1 | 167.8 | 811.1 | 175.7 | 982.2 | 183.2 |
| 472.1 | 155.1 | 643.0 | 167.8 | 814.2 | 175.7 | 985.0 | 183.0 |
| 475.2 | 155.3 | 646.0 | 168.1 | 817.1 | 175.9 | 988.1 | 183.0 |
| 478.1 | 155.6 | 649.2 | 168.1 | 820.2 | 175.9 | 991.1 | 183.2 |
| 481.2 | 156.1 | 652.1 | 168.4 | 823.1 | 176.2 | 994.1 | 183.5 |
| 484.0 | 156.4 | 655.1 | 168.6 | 826.2 | 176.4 |       |       |
| 487.1 | 156.6 | 658.0 | 168.6 | 829.0 | 176.7 |       |       |

---
